# Supplementary material for: Scalable Synthesis and Electrochemical Properties of Porous Si-CoSi2-C Composites as an Anode for Li-ion Batteries
Source: MDPI journal article supplement (doi:10.3390/ma14185397), 2021-09-18
Supplement: s1 [file s1]

# Supplementary Materials

## **Scalable synthesis and electrochemical properties of porous Si-CoSi<sub>2</sub>-C composites as an anode for Li-ion batteries**

Hyungeun Seo <sup>1</sup>, Hae-Ri Yang <sup>1</sup>, Youngmo Yang <sup>1</sup>, Kyungbae Kim <sup>1</sup>, Sung Hyon Kim <sup>2</sup>,  
Hyunseung Lee <sup>3</sup>, and Jae-Hun Kim <sup>1,\*</sup>

<sup>1</sup> School of Materials Science and Engineering, Kookmin University, Seoul 02707, Republic of Korea

<sup>2</sup> Department of Fashion Design, Kookmin University, Seoul 02707, Republic of Korea

<sup>3</sup> Department of Fashion Industry, Incheon National University, Incheon 22012, Republic of Korea

\* Correspondence: jaehunkim@kookmin.ac.kr

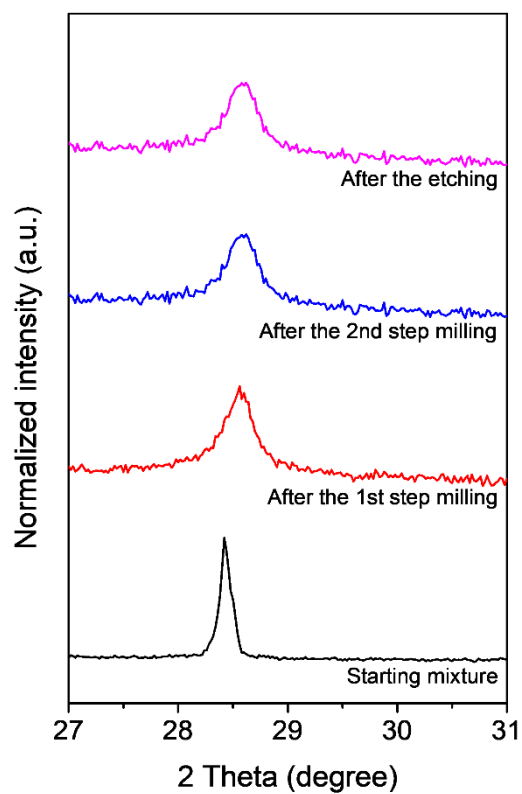

**Figure S1.** XRD patterns of the pristine mixture and the samples after each synthetic step between 27 and 31 degrees.

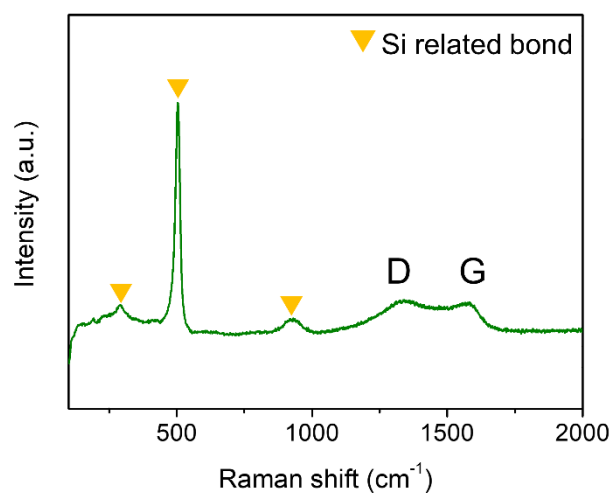

**Figure S2.** Raman spectrum of the synthesized composite.

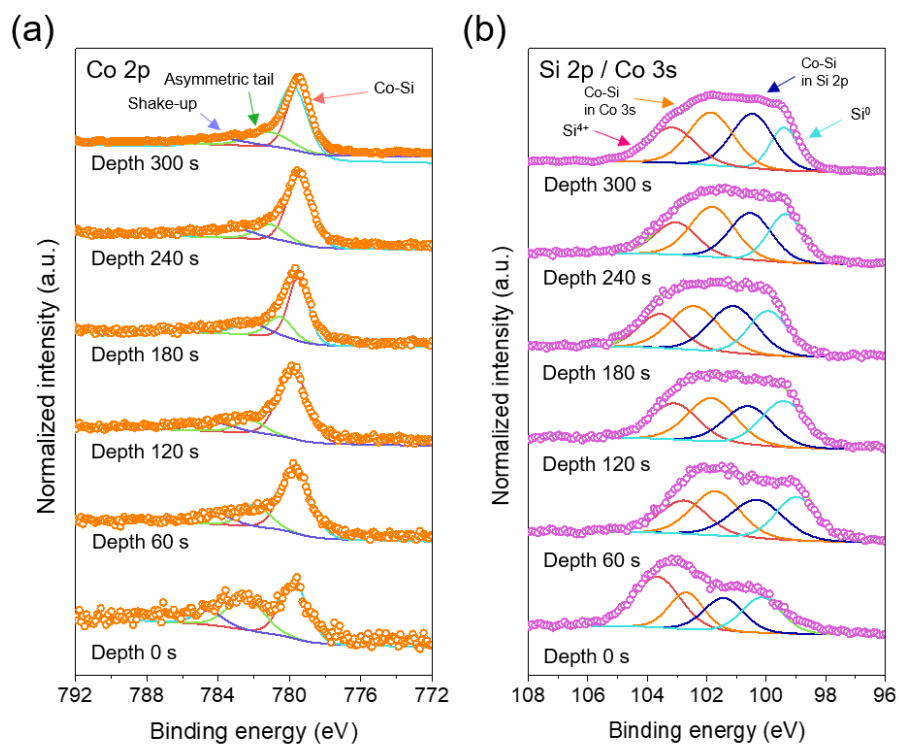

**Figure S3.** XPS core-level spectra with increasing sputtering time: (a) Co 2p and (b) Si 2p/Co 3s.

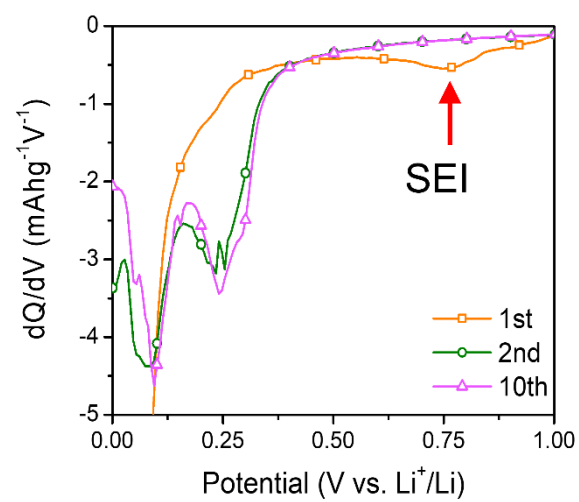

**Figure S4.** Enlarged DCPs of the porous Si-CoSi<sub>2</sub>-C composite electrode.

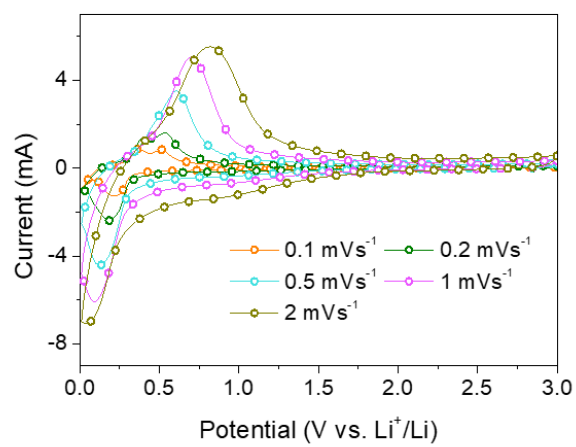

**Figure S5.** Cyclic voltammograms of the Si-CoSi<sub>2</sub>-C composite electrode at various scan rates.

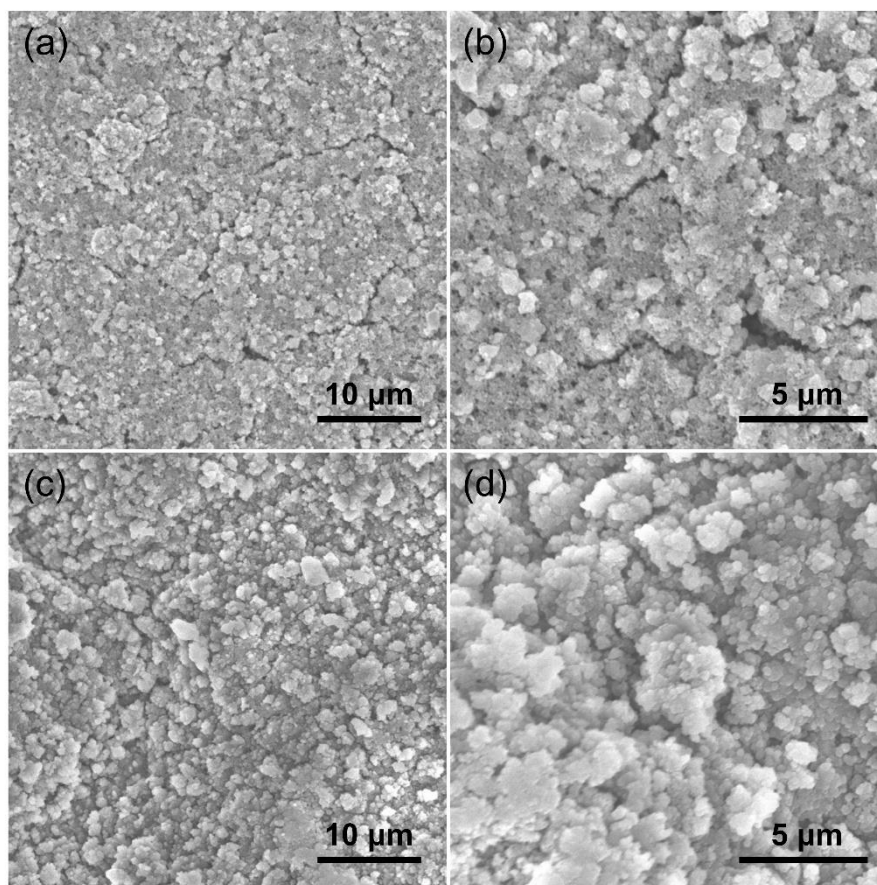

**Figure S6.** FE-SEM images of the porous Si-CoSi<sub>2</sub>-C composite electrodes (a, b) before cycling and (c, d) after 100 cycles.

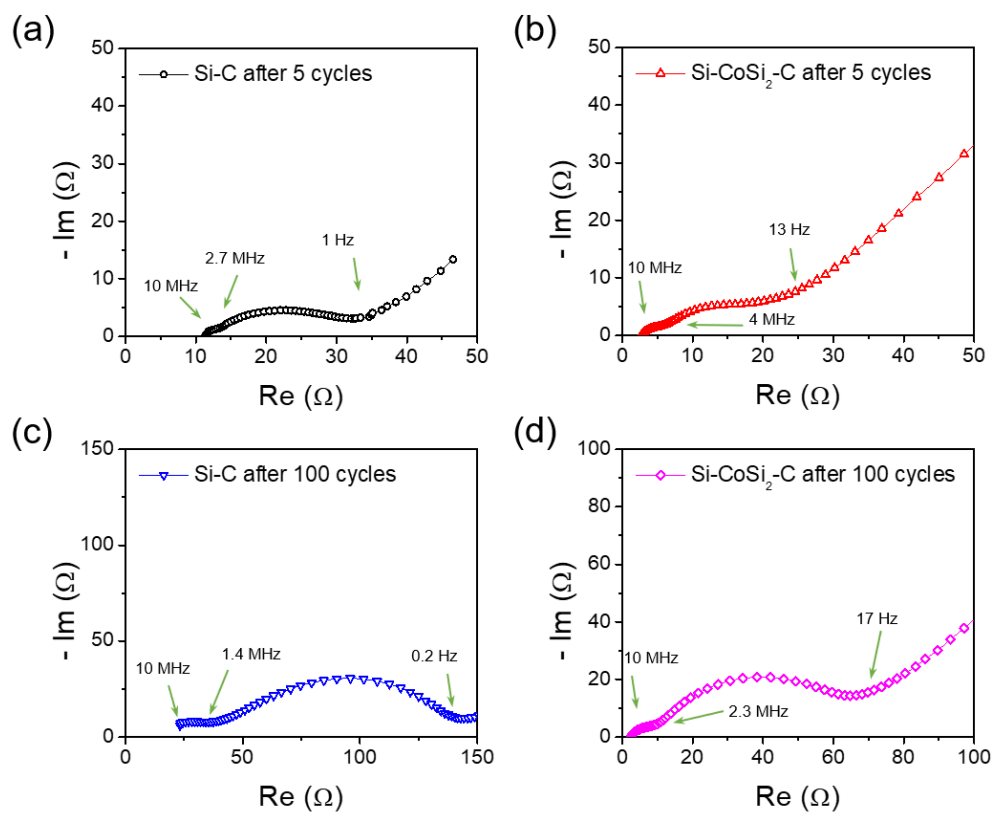

**Figure S7.** Enlarged Nyquist plots of the (a, c) Si-C and (b, d) Si-CoSi<sub>2</sub>-C composite electrodes after 5 and 100 cycles.
